# Supplementary material for: Enhanced Somatic Embryo Induction of a Tree Peony, Paeonia ostii ‘Fengdan’, by a Combination of 6-benzylaminopurine (BA) and 1-naphthylacetic Acid (NAA)
Source: MDPI journal article supplement (doi:10.3390/plants9010003), 2019-12-18
Supplement: s1 [file s1]

### Supplemental Figures

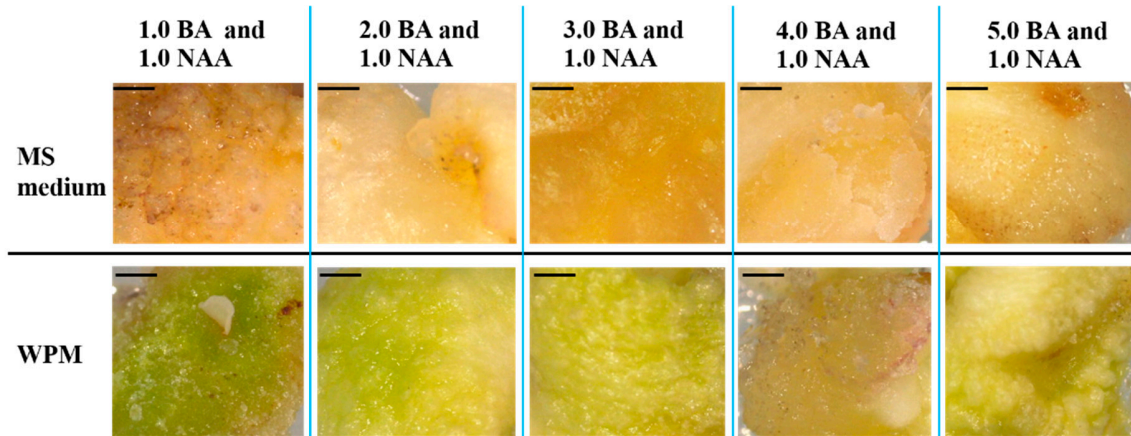

**Figure S1.** Effect of the basal medium and concentration of BA and NAA on callus induction from the zygotic embryo explant. Scale bar, 1.0 mm. Unit of PGR concentration is in  $\text{mg}\cdot\text{L}^{-1}$ . The data was recorded 1 month later.

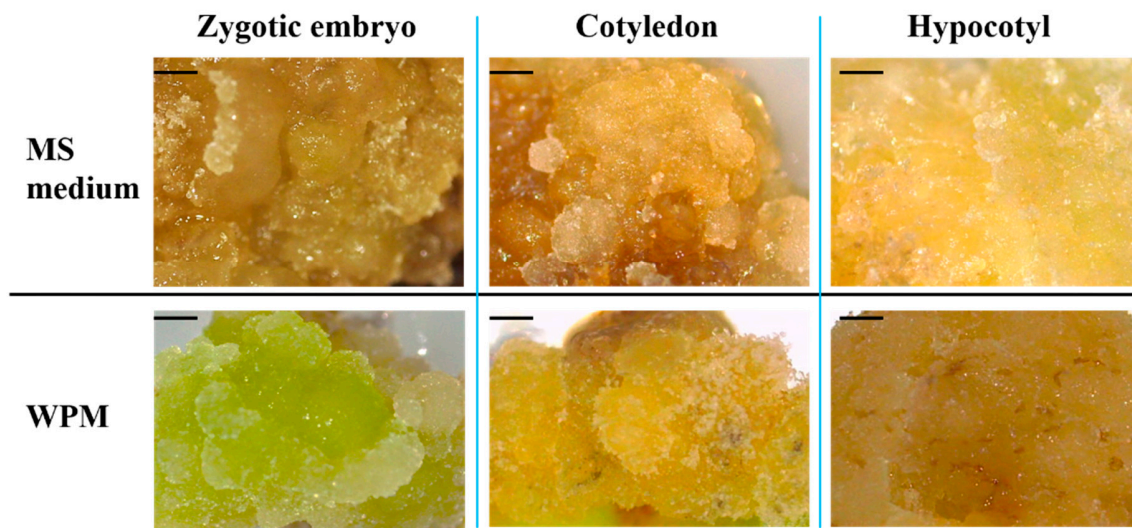

**Figure S2.** Effect of the basal medium and explant type on callus induction. The PGR combination used in this experiment is  $3.0 \text{ mg}\cdot\text{L}^{-1}$  BA and  $1.0 \text{ mg}\cdot\text{L}^{-1}$  NAA. Scale bar, 1.0 mm.
